# Pachytene karyotypes of 17 species of birds

Anastasia Y. Slobodchikova<sup>1,2†</sup>, Lyubov P. Malinovskaya<sup>1,2†</sup>, Ekaterina O. Grishko<sup>1</sup>, Inna E. Pristyazhnyuk<sup>1</sup>,  
Anna A. Torgasheva<sup>1,2</sup>, Pavel M. Borodin<sup>1\*</sup>

<sup>1</sup> Institute of Cytology and Genetics, Russian Academy of Sciences, Siberian Department, Novosibirsk, 630090, Russia.

<sup>2</sup> Novosibirsk State University, Novosibirsk 630090, Russia

\*Correspondence to borodin@bionet.nsc.ru

†These authors share first authorship

**RUNNING TITLE:** Pachytene karyotypes of 17 species of birds

**ADDITIONAL KEYWORDS:** avian chromosomes, synaptonemal complex, GRC, SYCP3, karyotyping, germline-restricted chromosome, extended centromeres, chromosome rearrangements

Abstract

Karyotypes of less than 10% of bird species are known. Using immunolocalization of the synaptonemal complex, the core structure of meiotic chromosomes at the pachytene stage, and centromere proteins we described male pachytene karyotypes of seventeen species of birds. This method enables higher resolution than the conventional analyses of metaphase chromosomes. We provided the first descriptions of the karyotypes of three species (Rook, Blyth's reed warbler and European pied flycatcher), corrected the published data on the karyotypes of ten species and confirmed them for four species. All passerine species examined have highly conservative karyotypes,  $2n=80-82$  with seven pairs of macrochromosomes and 33-34 pairs of microchromosomes. In all of them but not in the Common cuckoo we revealed single copies of the germline restricted chromosomes varying in size and morphology even between closely related species. This indicates a fast evolution of this additional chromosome. The interspecies differences concern the sizes of the macrochromosomes, morphology of the microchromosomes and sizes of the centromeres. The pachytene cells of the Gouldian finch, Brambling and Common linnet contained heteromorphic synaptonemal complexes indicating heterozygosity for inversions or centromere shifts. The European pied flycatcher, Gouldian finch and Domestic canary have extended centromeres in several macro- and microchromosomes.

## Introduction

Birds provide an interesting model to study chromosome evolution. They have undergone rapid speciation and evolved various adaptations to a wide variety of habitats. Yet, their karyotypes (chromosome sets) are very conservative. They are bimodal, i.e. composed of macro- and microchromosomes, the feature inherited from their reptilian ancestors<sup>1,2</sup>. Diploid chromosome number ( $2n$ ) of most karyotypes of bird species is about 78–82<sup>3</sup>. The number of chromosome arms, so-called fundamental number (FN), also vary in narrow limits: 90-110. Unfortunately, less than 10% of bird species have been karyotyped. In passerines, the most speciose and diverse order of birds, the portion of karyotyped species is even smaller – 7%<sup>4</sup>. Paradoxically, the karyotype is unknown even in the species whose genomes have been sequenced, annotated and studied in detail, such as the European pied flycatcher *Ficedula hypoleuca*<sup>5</sup>.

Most avian karyotypes have been described in the 1960-1970s with the use of conventional methods of chromosome preparation and staining available at that time<sup>3</sup>. Development of the methods of chromosome analysis at the pachytene stage of meiosis provided a rather efficient karyotyping tool<sup>6</sup>. These methods are based on visualization of the synaptonemal complex (SC), the structure that mediates synapsis and recombination of homologous chromosomes. SC is composed of two lateral elements, to which the chromatin loops are attached, and the central element that holds homologous chromosomes together. At the pachytene stage of meiotic prophase, the chromosomes are less compacted than at metaphase<sup>7</sup>. Therefore, analysis of SC provides higher resolution than the conventional analyses of metaphase chromosomes. This is especially important in the cytogenetics studies of the bimodal karyotypes because a morphology of the microchromosomes and even their number are rather difficult to assess at the conventional chromosome spreads<sup>8,9</sup>. The SC analysis is particularly efficient in the detection of heterozygosity for all types of chromosome rearrangements: inversions, translocations, deletions and duplications. The heterozygotes for the structural variants and heterogametic organisms produce characteristic heteromorphic SCs<sup>10-12</sup>.

Analysis of pachytene chromosomes led to the discovery of germline-restricted chromosome (GRC)<sup>13</sup>. The GRC was present in germline cells and absent in somatic cells in all 18 species of passerine birds examined so far<sup>14,15</sup>. It has not been found in any non-passerine bird<sup>14</sup>. In female germ cells, GRC is usually present in two copies, which synapse and recombine with each other. At the meiotic prophase, the GRC bivalents are practically indistinguishable from normal autosomal bivalents. They can only be revealed by a comparative subtractive analysis of pachytene and somatic karyotype. In male germ cells, GRC is usually present in one copy, which forms a univalent at pachytene, easily distinguishable from the bivalents of the autosomes and ZZ by its thin, coiled and often fragmented SC. The GRC univalents in male pachytene cells are always surrounded by dense chromatin clouds heavily labeled by anticentromere antibodies. Among the Passeriformes, the GRC varies in size and morphology<sup>13,14,16,17</sup>.

In this study, using immunolocalization of SYCP3, main protein of the lateral elements of synaptonemal complex (SC) and centromere proteins we examined male pachytene karyotypes of sixteen passerine species with special attention to the GRC and one outgroup species the Common cuckoo *Cuculus canorus*. The sources of the specimens are shown in Supplementary Table 1. In each specimen we photographed, thoroughly examined and

60 measured at least 20 well-spread pachytene nuclei containing complete chromosome sets. The measurements were  
 61 used to generate idiograms. We compared the pachytene karyotypes with the karyotypes described earlier and mostly  
 62 obtained by conventional methods of chromosome preparation and staining.

63 **Results**

64 Figure 1 shows microphotographs of the SC spreads after immunolocalization of SYCP3 (red) and centromere  
 65 proteins (blue) of all species examined. Figure 2 shows idiograms of pachytene karyotypes of the studied species. The  
 66 haploid chromosome number is equal to the number of the SCs (n), the haploid number of the chromosome arms is  
 67 equal to one for each acrocentric chromosome and to two for each meta- and submetacentric chromosome (Fn), the  
 68 total SC length and brief description of GRC are shown in Table 1.

69 The descriptions of the chromosome morphologies are based on the estimates of their centromeric indices.  
 70 Those with the centromeric index close to 0 is scored as the acrocentrics, between 0 and 0.4 as the submetacentrics,  
 71 and between 0.4 and 0.5 as the metacentrics. In all species, we identified the seven largest SCs as macro-SC, the others  
 72 – as micro-SCs.

73 We estimated the size of GRC based on the size of GRC chromatin labeled by anticentromere antibodies and  
 74 the length of the lateral element of GRC SC if it was completely formed. We classified GRCs of size comparable to  
 75 macrochromosomes of the basic set as macro-GRCs, others – as micro-GRCs. In most species, we found a variation in  
 76 the SC appearance of macro- and micro-GRCs between the cells. It could form a complete, or fragmented, or dot-like  
 77 lateral element of SC or do not form it at all.

78  
 79 **Table 1.** Haploid chromosome numbers (n), haploid numbers of the chromosome arms (Fn), total SC length of the basic  
 80 chromosome set and characteristics of GRC of 17 bird species  
 81

| Common name              | n  | Fn | SC length (µm) | No of cells analyzed | GRC    |
|--------------------------|----|----|----------------|----------------------|--------|
| Common cuckoo            | 40 | 48 | 387±68         | 60                   | Absent |
| Rook                     | 40 | 57 | 226±29         | 60                   | Micro  |
| Blyth's reed warbler     | 40 | 53 | 297±51         | 63                   | Macro  |
| Eurasian skylark         | 40 | 43 | 241±75         | 56                   | Macro  |
| European pied flycatcher | 40 | 55 | 309±47         | 175                  | Micro  |
| Bengalese finch          | 40 | 46 | 208±24         | 57                   | Macro  |
| Gouldian finch           | 40 | 46 | 238±34         | 27                   | Micro  |
| Pine bunting             | 40 | 48 | 216±33         | 60                   | Micro  |
| Common chaffinch         | 40 | 48 | 301±38         | 36                   | Micro  |
| Brambling                | 40 | 50 | 237±19         | 34                   | Micro  |
| Eurasian bullfinch       | 41 | 57 | 209±47         | 78                   | Macro  |
| European greenfinch      | 41 | 58 | 209±17         | 49                   | Micro  |
| Common redpoll           | 41 | 70 | 287±31         | 31                   | Macro  |
| Domestic canary          | 41 | 56 | 302±41         | 30                   | Micro  |
| European goldfinch       | 41 | 55 | 220±29         | 23                   | Micro  |
| Common linnnet           | 41 | 53 | 246±29         | 37                   | Macro  |
| Eurasian siskin          | 41 | 50 | 245±66         | 108                  | Macro  |

82

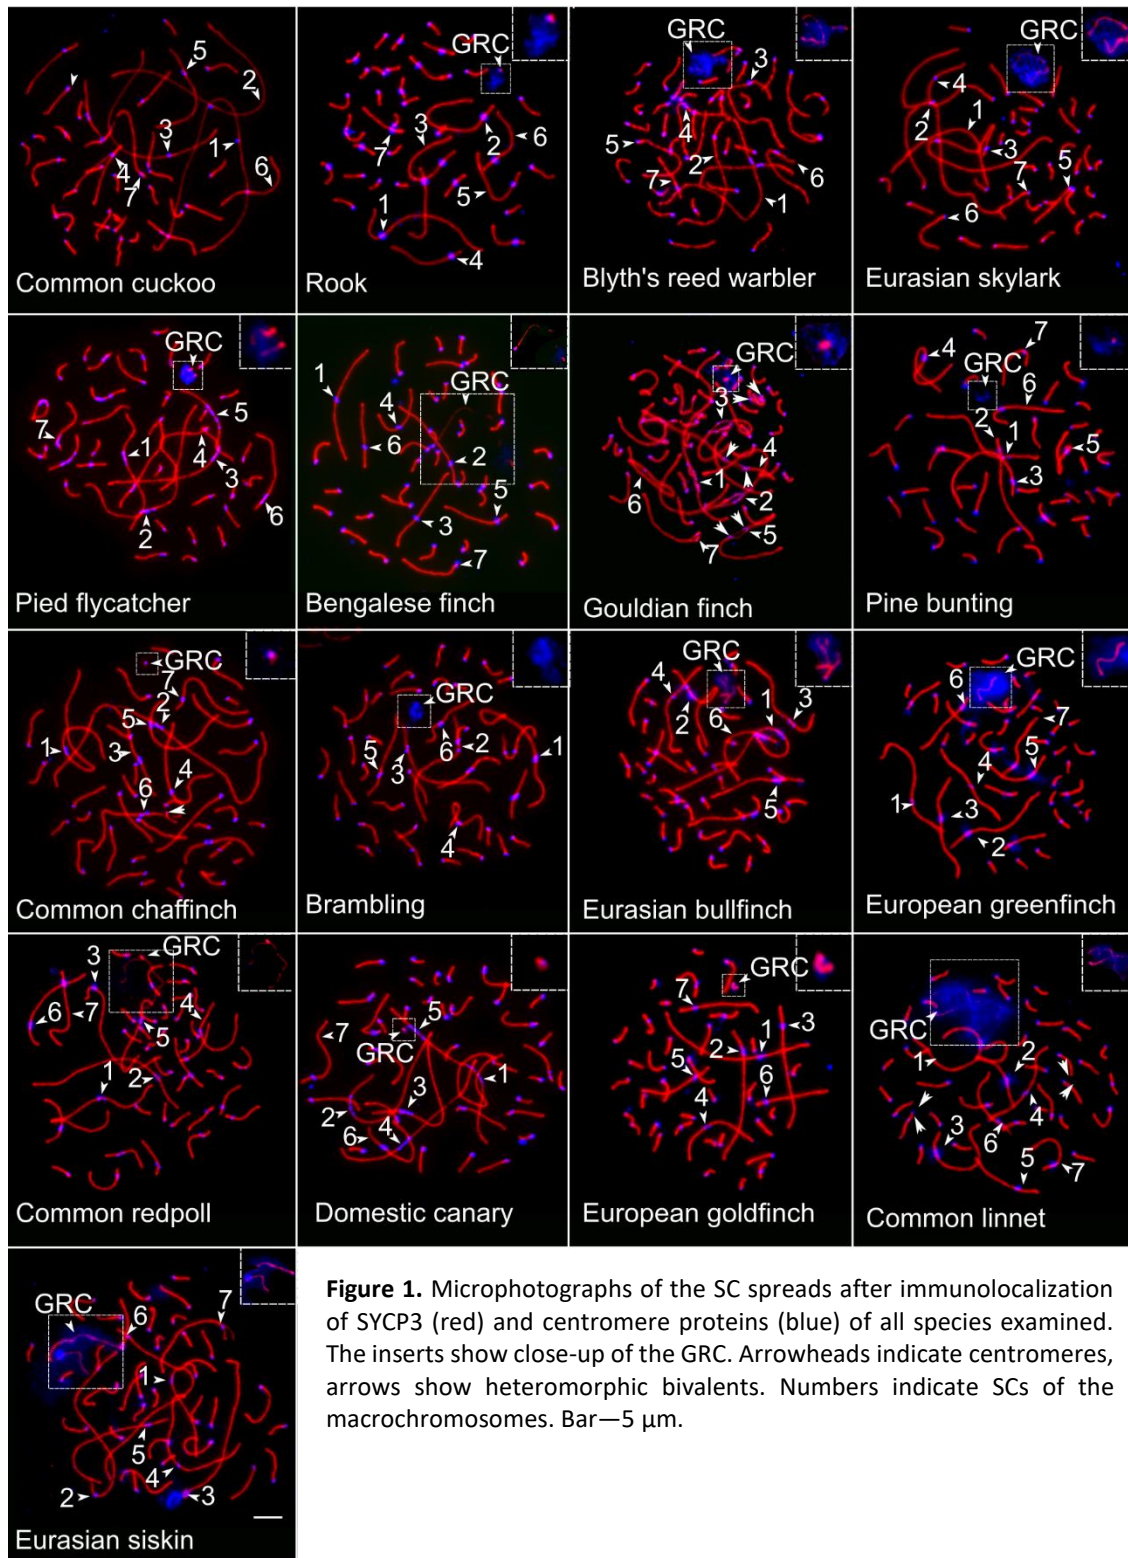

**Figure 1.** Microphotographs of the SC spreads after immunolocalization of SYCP3 (red) and centromere proteins (blue) of all species examined. The inserts show close-up of the GRC. Arrowheads indicate centromeres, arrows show heteromorphic bivalents. Numbers indicate SCs of the macrochromosomes. Bar—5 µm.

83

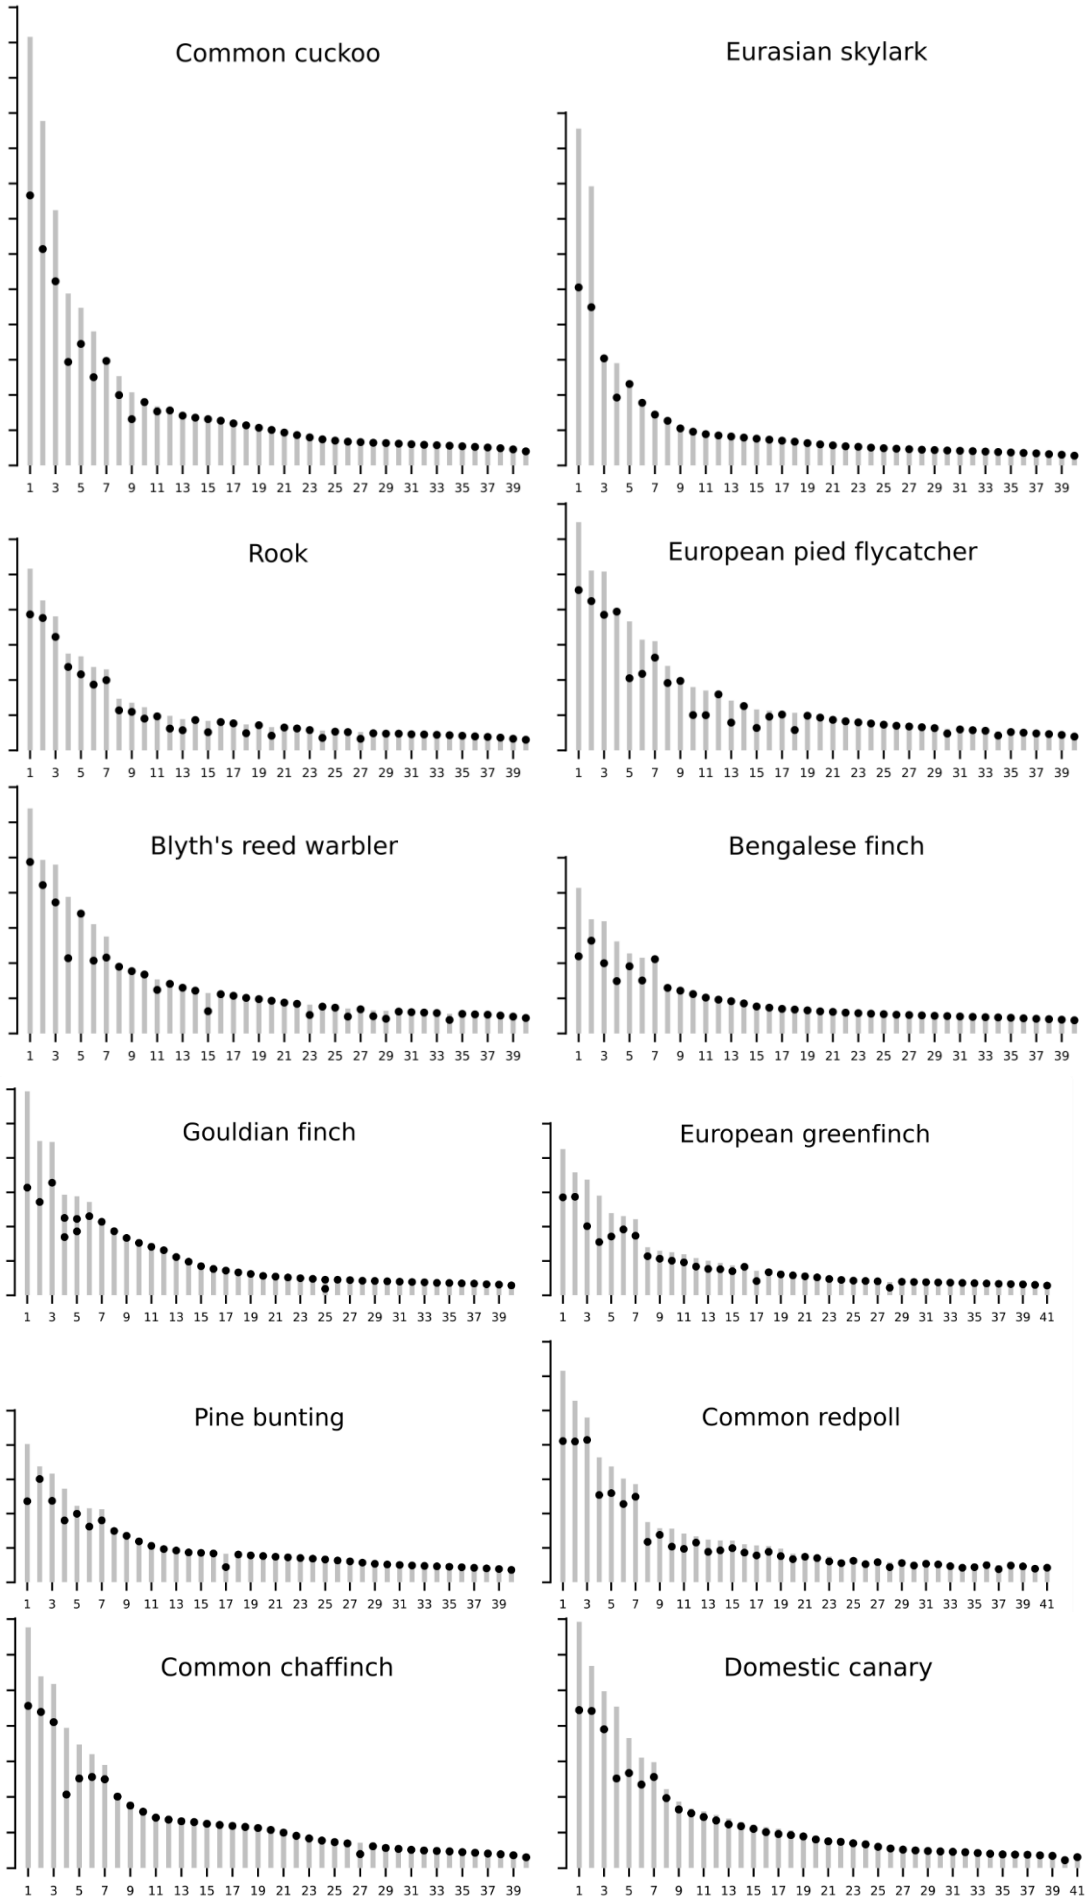

84

85

86

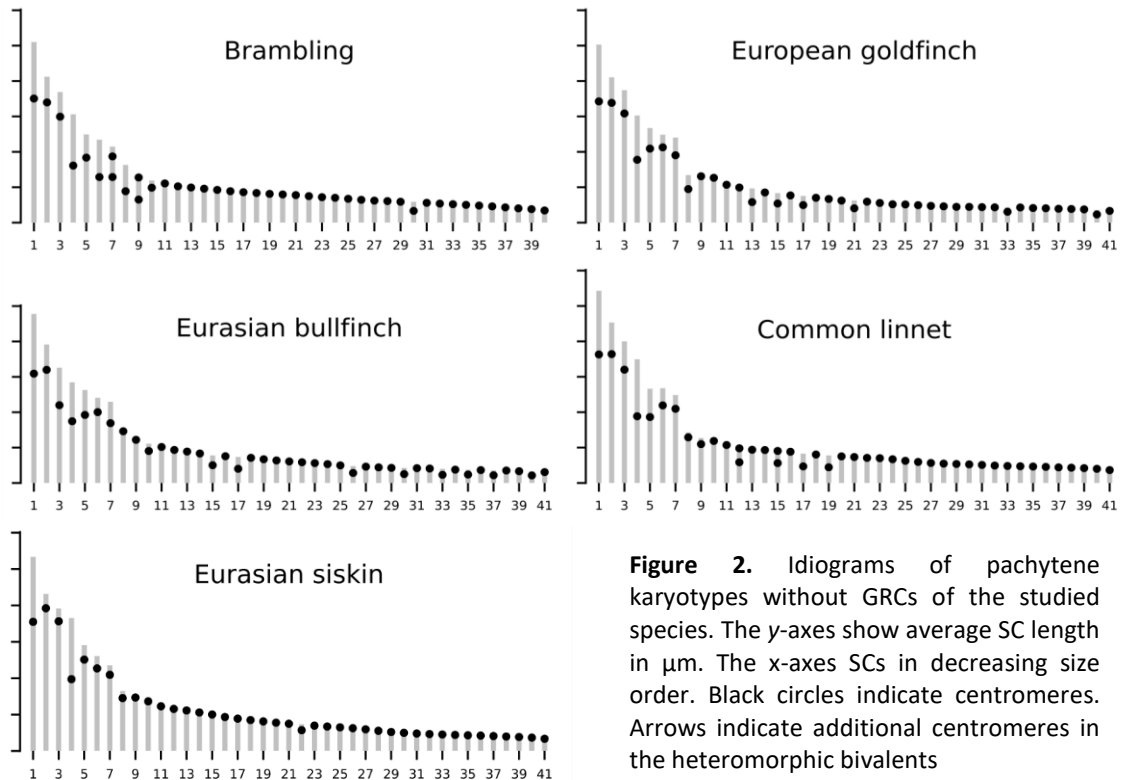

**Figure 2.** Idiograms of pachytene karyotypes without GRCs of the studied species. The y-axes show average SC length in  $\mu\text{m}$ . The x-axes SCs in decreasing size order. Black circles indicate centromeres. Arrows indicate additional centromeres in the heteromorphic bivalents

87

88

89

90

#### **Common cuckoo *Cuculus canorus***

The somatic karyotype of the Common cuckoo has been described by Bian and Li<sup>18</sup>. They indicated  $2n=78$ . The pachytene karyotype of this species comprises 40 chromosome pairs ( $2n = 80$ ). The total length of its SC set is one of the largest among the bird species examined so far. The excess of the SC length is mainly due to very large metacentric SCs 1 and 2 and submetacentric SC3. Macro-SC4 is a metacentric. Macro-SCs 5 and 6 and micro-SCs 8 and 9 are submetacentrics, Macro-SC7 and all other 30 micro-SCs are acrocentrics. The Common cuckoo as well as all other non-passerine birds studied so far does not have GRC in its pachytene karyotype.

97

#### **Rook *Corvus frugilegus***

The somatic karyotype of the Rook has not been studied yet. The diploid number of the closely related species *Corvus corax* is 80<sup>19</sup>. Our results indicate that the basic diploid chromosome set of the Rook is 80. The pachytene karyotype of Rook comprises 40 bivalents and one univalent of a GRC surrounded by a small cloud of anticentromere antibodies. All of Rook's macro-SCs are submetacentrics. Among the micro-SCs, there are ten submetacentrics and twenty-three acrocentrics. In most pachytene cells, GRC forms dot-like SC while in some cells SC is not formed.

100

101

102

#### **Blyth's reed warbler *Acrocephalus dumetorum***

The somatic karyotype of the Blyth's reed warbler remains unknown. The diploid number of the closely related species *Acrocephalus agricola* is 78<sup>20</sup>. Pachytene karyotype of the Blyth's reed warbler comprises 40 chromosome pairs ( $2n = 80$ ). Its macro-SCs 1, 2, 3, 6 and 7 are submetacentrics, SC4 is metacentric, SC5 is acrocentric. Most micro-SCs are acrocentrics. There are one metacentric and six submetacentric micro-SCs.

105

106

107

GRC in the Blyth's reed warbler occurs as a large acrocentric univalent with fragmented SC surrounded by a chromatin cloud labeled by anticentromere antibodies. The level of fragmentation varies between the cells from evenly labeled SC to a dispersed series of short fragments.

108

109

110

#### **Eurasian skylark *Alauda arvensis***

The first description of the Eurasian skylark somatic karyotype was provided by Udagawa<sup>21</sup> on the basis of histological sections of embryonic testes and ovaries. The spermatogonial  $2n$  was estimated as 78, oogonial as 77. Li and Bian<sup>22</sup> estimated  $2n$  the Oriental skylark *Alauda gulgula* as  $76\pm$ . We found that the pachytene karyotype of the Eurasian skylark contains 40 chromosome pairs ( $2n = 80$ ). In terms of SC sizes, it is extremely asymmetric. Metacentric SCs 1 and 2 comprise 36% of the total SC length. This is in agreement with the description of the Alaudidae karyotype by Li and Bian<sup>22</sup>. They described the Z- and W-chromosomes as the largest elements, metacentric and submetacentric respectively. The 1<sup>st</sup> macrochromosome was the second largest metacentric.

113

114

115

116

117

118

One of the two largest SCs in the pachytene karyotype of the Eurasian skylark is probably the neo-Z chromosome. Genomic analysis indicates that Z chromosome of several skylark species resulted from fusions between parts of the chromosomes Z, 3, 4A and 5. It is the largest sex chromosome found in birds (about 200 Mb)<sup>23,24</sup>. Another exceptionally large chromosome has probably also evolved via several chromosome fusions. Surprisingly, the chromosome number of the Eurasian skylark is the same as in most songbirds. This means that the fusions leading to

119

120

121

122

123

124 the formation of the two largest macrochromosomes had been preceded or followed by a series of chromosome  
 125 fissions. Besides the two largest macrochromosomes, the karyotype of the Eurasian skylark contains one  
 126 submetacentric macrochromosome. All other macrochromosomes and microchromosomes are acrocentrics.

127 GRC of the Eurasian skylark occurs as a large chromatin cloud heavily labeled with anticentromere antibodies.  
 128 It forms thin, pale and fragmented SC.

129 **European pied flycatcher *Ficedula hypoleuca***

130 The genome of the European pied flycatcher has been sequenced, annotated and studied in detail <sup>5</sup>, yet its  
 131 karyotype remains unknown. Its close relative *Ficedula parva* contains 40 chromosome pairs ( $2n=80$ ) <sup>25</sup>. The pachytene  
 132 karyotype of the European pied flycatcher contains 40 bivalents ( $2n=80$ ). Almost all its macro-SCs are submetacentrics,  
 133 SC4 is acrocentric, SC5 is metacentric. We are sure that SC4 is ZZ because analysis of pachytene oocytes of this species  
 134 revealed heteromorphic ZW bivalent with acrocentric Z axis <sup>26</sup>. Among micro-SCs there are five metacentrics and four  
 135 submetacentrics.

136 We observed extended pericentromeric regions in all meta- and submetacentric macro-SCs (but not in the  
 137 acrocentric ZZ) and in several largest micro-SCs. They appeared as beads of several dots, which cover from 9% of SC1 to  
 138 41% of SC11/13 (Supplementary Table 2). The antibodies against the histone H3, di- and trimethylated at lysine 9  
 139 (H3K9me2/3), marking transcriptionally inactive chromatin, produced strong signals at the standard centromeres of the  
 140 pachytene chromosomes, but not at the extended ones (Fig. 3a). In the corresponding somatic metaphase  
 141 chromosomes of this species, we observed extended primary constrictions (Fig 3b).

142 GRC in the European pied flycatcher usually appears as a chromatin cloud heavily labeled with anticentromere  
 143 and H3K9me2/3 antibodies containing several SC fragments. All cells of one specimen contained one GRC. Another  
 144 specimen was mosaic: 93 % of its pachytenes (126 out of 135) contained two univalents of GRC, the remaining cells  
 145 contained one GRC. Earlier polymorphism and mosaicism for GRC number has been detected in the pale martin, great  
 146 tit <sup>16,17</sup>.

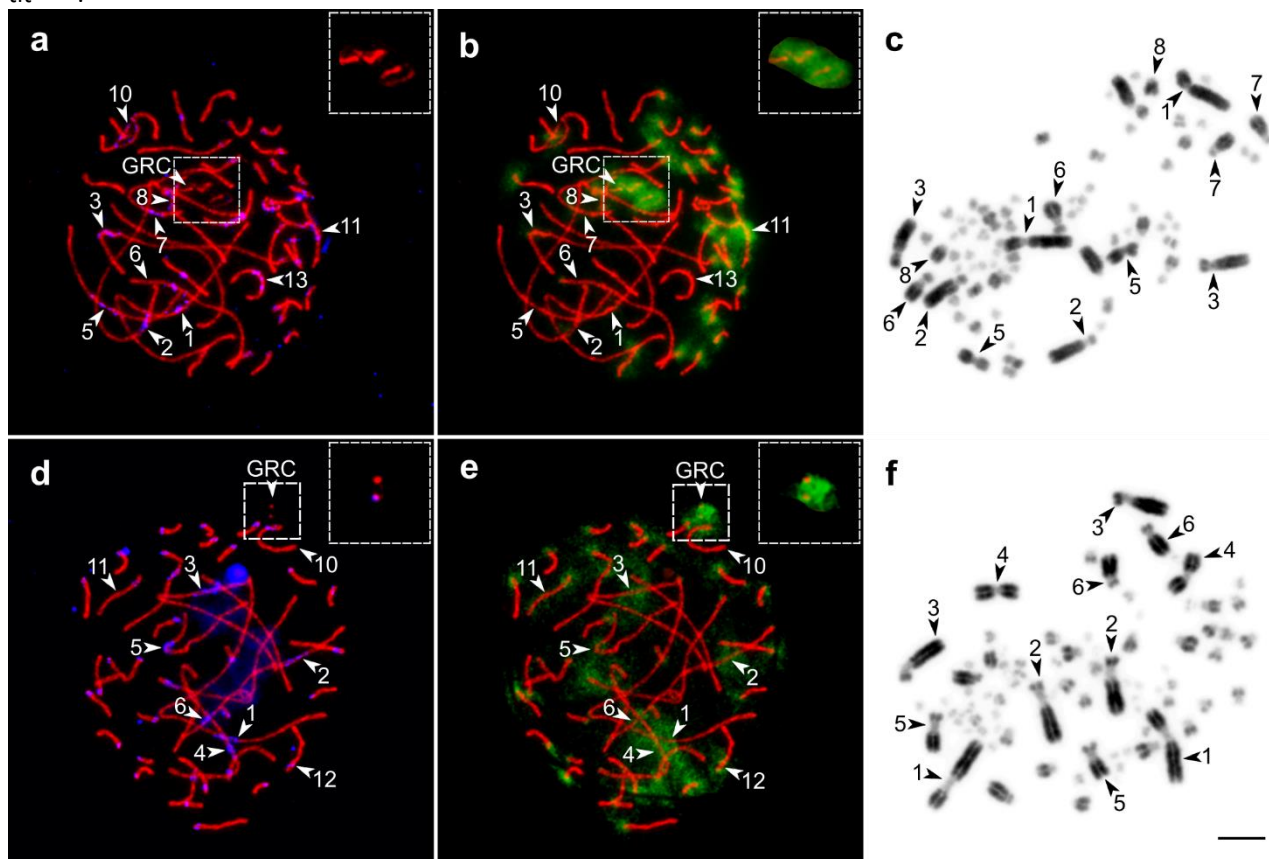

147 **Figure 3.** Pachytene spermatocytes immunolabeled with antibodies against SYCP3 (red) and centromere  
 148 proteins (blue) (a,d) and H3K9me2/3 (green) (b, e); and somatic metaphase chromosomes stained with DAPI (c,f) of the  
 149 European pied flycatcher (top row) and Domestic canary males (bottom row). The arrowheads indicate the extended  
 150 centromeres and GRCs. The inserts show close-up of the GRCs. Bar—5 μm.

151  
 152  
 153 **Bengalese finch *Lonchura striata domestica***

154 Pachytene karyotype of the Bengalese finch comprises 40 chromosome pairs ( $2n=80$ ). This coincides with the  
 155 description given by del Priore and Pigozzi <sup>27</sup> and differs from the earlier description of its somatic karyotype as  $2n=78$   
 156 <sup>28-30</sup>. Its SCs 1 and 4 are metacentrics, SCs 2, 3, 5 and 6 are submetacentrics. All other SCs are acrocentrics.

157 The Bengalese finch GRC has been first described by del Priore and Pigozzi<sup>27</sup> and then by Torgasheva *et al.*<sup>14</sup>.  
158 It appears as the largest acrocentric univalent in the pachytene nucleus. We found a variation in the appearance of GRC  
159 SC between the cells: from complete lateral element to dot-like SC. Despite variation in the degree of SC polymerization,  
160 the cloud of anticentromere antibodies labeled GRC was similarly large in all cells, which allowed us to classify GRC of  
161 Bengalese finch as macro-GRC in accordance with the previous descriptions<sup>14,27</sup>

162 **Gouldian finch *Erythrura gouldiae***

163 Christidis<sup>28</sup> described 2n of the Gouldian finch as 78. We found 40 chromosome pairs (2n=80) in pachytene  
164 cells of this species. SCs 1 and 2 are metacentrics, SCs 3 to 6 are submetacentrics. Macro-SC7 and all micro-SCs are  
165 acrocentrics. SCs 1, 2 and 3 have extended centromeres, similar to those described in the European pied flycatcher.  
166 They occupy around 13-20% of SC length (Supplementary Table 2). In half of cells analyzed, these regions are asynapsed  
167 whereas all other SCs are completely synapsed (Fig. 1). The delayed synapsis could be caused by an unusually extended  
168 pericentromeric heterochromatin.

169 We found heteromorphic SCs 4, 5 and 25. SC4 has two centromeres in metacentric and submetacentric  
170 positions. SC5 has two centromeres in different submetacentric positions. SC25 has centromeres in acrocentric and  
171 metacentric positions. GRC appears as a moderately sized chromatin cloud comparable to the largest  
172 microchromosomes labeled with anticentromere antibodies surrounding from one to three SC fragments.

173 **Pine bunting *Emberiza leucocephalos***

174 In the Pine bunting pachytene spermatocytes, we observed 40 bivalents (2n=80) while Radzhabli *et al.*<sup>31</sup> and  
175 Bulatova<sup>32</sup> described the diploid number of the somatic karyotype of this species as 2n=78. The pachytene karyotype  
176 of this species is rather similar to that of the Bengalese finch described above. There are three differences. SC4 is  
177 submetacentric, SC7 is submetacentric and one of the micro-SCs is metacentric. GRC of the Pine bunting is labeled by a  
178 small cloud of anticentromere antibodies. In most cells, GRC does not form the lateral element of SC, in some cells we  
179 detected a dot-like signal of anti-SYCP3 antibodies.

180 **Common chaffinch *Fringilla coelebs***

181 The Common chaffinch is an important model for evolutionary genetic studies. Its high-quality genome  
182 assembly has recently been published<sup>33</sup>. Our estimate of the Common chaffinch karyotype coincides with the earlier  
183 published one (2n= 80)<sup>34</sup>. Its pachytene karyotype comprises 40 chromosome pairs. Total SC length and the lengths of  
184 the macro-SCs in the Common chaffinch are much longer than in the closely related Pine bunting (Table 1). However,  
185 the morphology of their chromosomes is rather similar except SC1, which is submetacentric in the Common chaffinch.

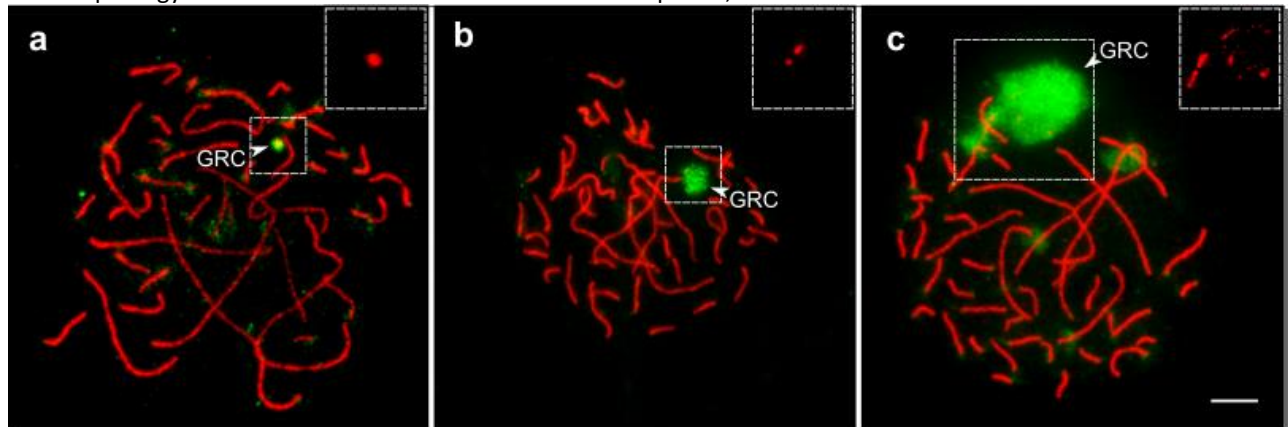

186 **Figure 4** Pachytene spermatocytes of the Common chaffinch (a), Brambling (b) and Common linnet (c) after  
187 immunostaining with antibodies against SYCP3 (red) and H3K9me2/3 (green). The arrowheads indicate GRCs. The  
188 inserts show close-up of the GRCs. Bar—5  $\mu$ m.

189 GRC of the Common chaffinch forms dot-like SC labeled by a small cloud of anticentromere and H3K9me2/3  
190 antibodies. To our surprise, in half of pachytene spermatocytes (26 out of 49 examined), we observed a univalent of a  
191 small microchromosome. Unlike the GRC, it was not labeled either with anticentromere or with H3K9me2/3 antibodies  
192 (Fig. 4a). We suggest that this univalent was originated by a premeiotic nondisjunction of one of the microchromosomes.  
193

194 **Brambling *Fringilla montifringilla***

195 The somatic karyotype of the Brambling has been described as 2n=78<sup>35</sup>. We observed 40 pairs of chromosomes  
196 (2n=80) which were morphologically similar to the pairs detected in the Common chaffinch. There are a few differences.  
197 SC6 is metacentric, and two of micro-SCs are metacentric and one – is a submetacentric.

198 The specimen examined here has heteromorphic SCs 7 and 9. Each of them contains two centromeres in all  
199 cells examined. One homolog of chromosome 7 is the submetacentric as in most fringillids examined here. The other  
200 homolog of chromosome 7 is metacentric, which had probably resulted from pericentric inversion, as well as the  
201 metacentric homolog of the acrocentric chromosome 9 typical for the fringillids.

202 Similar to the GRC of the Pine bunting, the GRC of the Brambling is labeled by a small cloud of anticentromere  
203 antibodies and does not form the lateral element of SC in most analyzed cells. In some cells, we detected dot-like signals  
204 of anti-SYCP3 antibodies.

#### 205 **Eurasian bullfinch *Pyrrhula pyrrhula***

206 Li and Bian<sup>35</sup> described the somatic karyotype of the Eurasian bullfinch as  $2n=78$ . The pachytene cells of this  
207 species contain 41 chromosome pairs ( $2n=82$ ). All macro-SCs are submetacentric. Among micro-SCs we observed four  
208 metacentric and five submetacentric micro-SCs.

209 GRC of this species has been described by Torgasheva *et al.*<sup>14</sup>. It forms long acrocentric univalent evenly labeled  
210 by SYCP3 antibodies.

#### 211 **European greenfinch *Chloris chloris***

212 The diploid chromosome number of the European greenfinch is 76 according to Hammar and Herlin<sup>36</sup> and 80  
213 according to Christidis<sup>37</sup>. We detected 41 bivalents ( $2n=82$ ) in pachytene cells. The morphology of the seven largest  
214 macro-SCs is very similar to that described for the Eurasian bullfinch except for the morphology of macro-SCs 3 and 4.  
215 They are metacentric in the European greenfinch. The three smallest macro-SCs and eight largest micro-SCs are  
216 submetacentrics. There are also two metacentric micro-SCs while all the others are acrocentrics.

217 GRC of the European greenfinch appears as a partially formed lateral element of SC comparable in size to the  
218 largest microchromosomes and labeled by anticentromere antibodies.

#### 219 **Common redpoll *Acanthis flammea***

220 According to Li and Bian<sup>35</sup> diploid chromosome number of the Common redpoll is 78. According to our  
221 estimate, it is 82. All macro-SCs are submetacentric. Among micro-SCs, twenty-two are submetacentrics and twelve are  
222 acrocentrics.

223 The pachytene karyotype of the Common redpoll also contains large acrocentric univalent of GRC evenly  
224 labeled by antibodies to SYCP3. In some cells, the SC of GRC was fragmented.

#### 225 **Domestic canary *Serinus canaria forma domestica***

226 The karyotype of the Domestic canary has been first described by Ohno *et al.*<sup>38</sup> as  $2n=80\pm$  and recently by Da  
227 Silva Dos Santos *et al.*<sup>39</sup> and Kiazim *et al.*<sup>40</sup> as 80. The Domestic canary genome has been assembled and annotated but  
228 not yet to a chromosome level<sup>41</sup>.

229 Pachytene cells of the Domestic canary contain 41 chromosome pairs ( $2n=82$ ). Its macro-SCs are larger than  
230 those in the fringillids described above, although their morphology is similar. Macro-SC4 is metacentric, all other macro-  
231 SCs are submetacentric. Eight micro-SCs are submetacentrics. All other micro-SCs of the Domestic canary are  
232 acrocentrics.

233 The Domestic canary shows unusually extended centromeres of macro-SCs and the largest micro-SCs, similar  
234 to that detected in the European pied flycatcher and the Gouldian finch. They were about 2-3  $\mu\text{m}$  long covering about  
235 10% of the SCs 1, 2/3, 4, 6, and about 15% of the SCs 5 and 10/11/12 (Fig. 3c, Supplementary Table 2). The antibodies  
236 against H3K9me2/3 label both the standard and extended centromeres of the pachytene chromosomes (Fig. 3c). We  
237 also detected substantially extended primary constrictions at the corresponding metaphase chromosomes (Fig. 3d).

238 GRC of this species has been described by Torgasheva *et al.*<sup>14</sup>. It appears as a small cloud of anticentromere  
239 antibodies with the dot-like lateral element of SC.

#### 240 **European goldfinch *Carduelis carduelis***

241 Christidis<sup>37</sup> described the somatic karyotype of the European goldfinch as  $2n=82$ . Our data confirm this diploid  
242 chromosome number. We observed 41 bivalents in the pachytene cells of the European goldfinch. Its seven largest  
243 macro-SCs were smaller than those of the Domestic canary but similar in morphology. We observed one metacentric  
244 and six submetacentric micro-SCs, all other micro-SCs are acrocentric.

245 GRC of the European goldfinch has been described by Torgasheva *et al.*<sup>14</sup> as micro-GRC. In most cells, GRC was  
246 present as one or two dot-like lateral SC fragments labeled by a small cloud of anticentromere antibodies. In some cells,  
247 GRC formed a complete lateral SC element.

#### 248 **Common linnet *Carduelis cannabina***

249 Bulatova<sup>20,32</sup> found 82 chromosomes in bone marrow cells of the Common linnet. This is in good agreement  
250 with our observation. We found 41 bivalents. Pachytene karyotypes of the Common linnet and the European goldfinch  
251 are almost the same. The difference concerns the morphology of the micro-SCs. The Common linnet has only two  
252 homomorphic metacentric and two heteromorphic metacentric/acrocentric micro-SCs. Micro-SC9 is submetacentric.  
253 All other micro-SCs are acrocentrics.

254 The heteromorphic SCs 12 and 15 contain two centromeres in all cells examined: one in acrocentric and one in  
255 metacentric positions. The metacentric homologs had probably resulted from pericentric inversions.

256 GRC of the Common linnet occurs as an acrocentric univalent with fragmented SC labeled by a large cloud of  
257 anticentromere antibodies.

#### 258 **Eurasian siskin *Spinus spinus***

259 The diploid chromosome number in the Eurasian siskin was estimated as 78<sup>30,32,35,42</sup>. We found 41 chromosome  
260 pairs in the pachytene cells of this species ( $2n=82$ ). The morphology of the macro-SCs is rather similar to that in the two



261 fringellid species described above. However, the karyotype of the Eurasian siskin contains only two submetacentric  
262 micro-SC, all other micro-SCs are acrocentrics.

263 Torgasheva et al.<sup>14</sup> classified its GRC as macro-GRC. In our spreads, it occurs as a large cloud of anticentromere  
264 antibodies with fragmented SC.

### 265 Discussion

266 The main results of this study are:

- 267 1) the first description of the karyotypes of three species (the Rook, Blyth's reed warbler and European  
268 pied flycatcher),
- 269 2) the correction of the published data on the karyotypes of ten songbird species,
- 270 3) the first detection of the extended centromeres in three model species (the European pied flycatcher,  
271 Gouldian finch and Domestic canary),
- 272 4) the first detection of chromosomal polymorphism in three species (the Gouldian finch, Brambling and  
273 Common linnet),
- 274 5) and detailed characterization of the GRCs of all songbird species examined

275 Why are we sure that our descriptions of the karyotypes are more precise and reliable than the published data  
276 based on conventionally prepared and stained somatic metaphase spreads?

277 There are at least four reasons for this. First, the pachytene chromosomes of birds are about 2-3 times longer  
278 than somatic metaphase chromosomes (see Fig.3). Second, each object, which we identified at the microphotography  
279 as the bivalent of the basic chromosome set, was simultaneously labeled with two different antibodies: against SYCP3,  
280 the main protein of the lateral elements of the SC, and the centromere proteins. Univalents were distinguished from  
281 the bivalents by less intense SYCP3 labeling. Therefore a misidentification of the microchromosome as cell debris and  
282 the cell debris as a microchromosome was unlikely. Third, these three criteria were applied to at least 20 well-spread  
283 pachytene cells containing complete chromosome sets. This made our estimates statistically sound. Fourth, the bivalents  
284 were not just counted, they were measured. This made possible an objective estimate of the morphology of the  
285 macrochromosomes and, what is more important and almost impossible at the somatic metaphases, the morphology  
286 of the microchromosomes.

287 A comparison between our and previously published chromosome numbers of the examined species shows  
288 that the earlier researchers always undercounted one or two chromosome pairs (Table 1). These errors were due to the  
289 very small sizes of the smallest microchromosomes and the relatively low specificity of the chromosome dyes. For these  
290 reasons, it was almost impossible to estimate the morphology of the small microchromosomes at the mitotic metaphase  
291 spreads. It was believed that of all them were acrocentric<sup>42</sup>. Our data show that this is true for the Common cuckoo,  
292 Eurasian skylark and Bengalese finch. Other songbirds have at least one meta- or submetacentric microchromosome,  
293 and most of the species have many of them.

294 Using anticentromere antibodies, we revealed unusual extended centromeres in almost all  
295 macrochromosomes and the largest microchromosomes of three model species (the European pied flycatcher, Gouldian  
296 finch and Domestic canary). They are visible both at the pachytene and mitotic metaphase spreads of these species.  
297 They are also visible in the published images of the Domestic canary metaphase chromosomes and shown at the  
298 idiograms<sup>39,40</sup> but did not attract much attention.

299 Such long centromeres are rare. They have been detected in a few species of legumes<sup>43,44</sup>, fire ants<sup>45</sup>, Indian  
300 muntjac<sup>46</sup> and marsupial hybrids<sup>47</sup>. However, they have not yet been described in birds. Robertsonian translocations  
301 and centromere drive have been suggested among the possible causes of the centromere extension<sup>45,46</sup>. The results of  
302 H3K9me2/3 immunolocalization indicate a variation in the epigenetic status of the extended centromeres. In the  
303 Domestic canary, both extended and standard centromeres are H3K9me2/3-positive indicating their heterochromatic  
304 state. In the European pied flycatcher, the standard centromeres are H3K9me2/3-positive, while the extended  
305 centromeres are H3K9me2/3-negative. Genetic composition of the extended centromeres deserve special attention.

306 One more advantage of the SC analysis is its high efficiency in the detection of the structural heterozygosity. In  
307 this study, we detected heteromorphic SC in the Gouldian finch, Brambling and Common linnet. In all cases, the  
308 bivalents displayed two misaligned centromeres. This may indicate heterozygosity either for pericentric inversions or  
309 for centromere repositions (centromere shift)<sup>48</sup>. Both types of chromosome rearrangements are implicated for  
310 karyotypic macroevolution of birds<sup>40,49</sup>. The inversions play an especially important role in the restriction of the gene  
311 flow between sympatric and parapatric species<sup>50</sup>. However, the intraspecific polymorphism for inversion is poorly  
312 studied in birds. Our findings indicate the targets for future studies.

313 Our study revealed a wide variation in GRC size and appearance. Torgasheva et al.<sup>14</sup> suggested to classify them  
314 as macro- and micro-GRCs to fit the criteria for macro- and microchromosomes of the basic set. Indeed, all analyzed  
315 chromosomes fell into one of these categories. However, some micro-GRCs were much smaller than the smallest  
316 microchromosomes of the basic set that can be inferred from the size of the chromatin cloud labeled by anticentromere  
317 and H3K9me2/3 antibodies. This variation and the lack of phylogenetic clustering by size confirm the highly dynamic  
318 nature of GRC<sup>14</sup>. It was shown that GRCs of different species contain different multiply repeated sequences, which  
319 probably can be accumulated and/or be lost rather quickly<sup>51</sup>.

320 The SC of GRCs in pachytene spermatocytes of most species examined here appeared fragmented, however,  
321 the degree of fragmentation varied between cells. It is unclear if this feature is related to the different properties of  
322 GRCs in different species (its genetic content, the degree of heterochromatinization) or the intercellular and  
323 interindividual variation in the effectiveness of cohesin loading and SC polymerization since for most birds studied to  
324 date, only one sample was analyzed. The interindividual variation in GRC appearance was observed in pachytene  
325 spermatocytes of the Great tit<sup>17</sup>. The intense chromatin labeling with antibodies to centromere proteins and H3K9-  
326 modified histone allowed us to distinguish between GRC and accidental autosomal univalents.

327 The results of our study indicate several lines of future research. To minimize sacrificing birds we described the  
328 karyotype of most species by single specimen examined. The sample size might be increased at least for the most  
329 interesting species by targeted examination of the somatic karyotypes, which can be obtained from short-term  
330 fibroblast cultures derived from blood or feather pulp.

331 It seems important to estimate the frequency, geographic distribution and probable adaptive significance of  
332 the inversion polymorphism detected in the Gouldian finch, Brambling and Common linnnet, the species with wide  
333 breeding and residence areas.

334 Another interesting species is the Eurasian skylark with two giant chromosomes. The origin of its Z/W  
335 chromosomes has been resolved<sup>23,24</sup>. The genetic content of another giant chromosome of the Eurasian skylark remains  
336 unknown. FISH with universal BAC-probes<sup>52</sup> might shed a light on its origin. The microchromosomes of this species also  
337 deserve close attention because despite the fusions of several macrochromosomes in the neo-Z and in another giant  
338 chromosome its chromosome number remains the same as in most songbirds.

339 The nature, evolution and adaptive significance of the extended centromeres of Gouldian finch, European pied  
340 flycatcher, and Domestic canary are of special interest. Recent advances in sequencing and bioinformatic analysis of the  
341 repetitive DNA of birds<sup>53</sup> make it possible to address these questions.

#### 342 **Methods**

##### 343 **Specimens**

344 Adult males were sampled at the beginning of the breeding season (April-May). The sources of the material,  
345 the number of specimens are shown in Supplementary Table 1. The birds were handled and euthanized in accordance  
346 with the approved national guidelines for the care and use of laboratory animals.

##### 347 **Spermatocyte spreading and immunostaining**

348 Chromosome spreads were prepared by the drying down method<sup>54</sup>. Testes were dissected and placed in an  
349 extraction buffer for 30–60 min. Small pieces of testis were macerated in 40 µl of 0.1M sucrose on a clean glass slide. A  
350 drop of the fine suspension was dropped at the slide dipped in 1% paraformaldehyde solution (Sigma-Aldrich, cat#  
351 158127), pH 9.2. The slides were incubated for 2 h in a humid chamber, washed in 0.4% Kodak Photo-Flo 200 (Kodak,  
352 cat# 742057), dried at room temperature and kept in sealed containers at -20°C until use.

353 Immunostaining was performed according to Anderson et al.<sup>55</sup> using rabbit polyclonal anti-SYCP3 (1:500;  
354 Abcam, cat# ab15093), human anticentromere (1:100; Antibodies Inc., cat# 15–234) and mouse monoclonal anti-  
355 H3K9me2/3 (1:100, Cell Signaling, cat# 5327) primary antibodies. The secondary antibodies used were Cy3-conjugated  
356 goat anti-rabbit (1:500; Jackson ImmunoResearch, cat# 111-165-144), AMCA-conjugated donkey anti-human (1:100;  
357 Jackson ImmunoResearch, cat# 709-155-149) and FITC-conjugated goat anti-mouse (1:100; Jackson ImmunoResearch,  
358 cat# 115-095-003). The slides were incubated overnight with primary antibodies and 1 h with secondary antibodies at  
359 37°C in a humid chamber. Slides were mounted in Vectashield antifade mounting medium (Vector Laboratories, cat# H-  
360 1000-10, United States).

##### 361 **Mitotic metaphase chromosome preparations**

362 The mitotic metaphase chromosomes were obtained from the cell culture of the gonads. The primary cell  
363 cultures were established from the minced gonads, that were successively treated with 100ng/ml Collagenase I (Sigma,  
364 cat# SCR103) and 0.25% Trypsin-EDTA (Sigma, cat# T4174) for 20 min by every component at 37 °C. The cell cultures  
365 were maintained in Dulbecco's Modified Eagle's medium (Gibco, cat# 41965039) supplemented with 10% Fetal bovine  
366 serum (Gibco, cat# 10270106), 2% Chicken serum (Gibco, cat# 16110082), GlutaMAX supplement (TermoFisher, cat#  
367 35050038) and penicillin/streptomycin (Sigma-Aldrich, cat# P0781). Preparation of metaphase chromosomes from the  
368 bird's cell culture was performed at the 2d to 3d passage according to modified protocol of chicken spermatogonial and  
369 follicles cell culture<sup>56,57</sup>. Briefly, the cell culture was incubated in a culture medium with the addition of 0.1 µg/ml  
370 colchicine for 3 h and collected by trypsin treatment. The cells were treated with hypotonic solution (0.56% KCl) for 30  
371 min and fixed in 3:1 Methanol: Glacial Acetic Acid. Slides were mounted in Vectashield antifade mounting medium with  
372 DAPI (Vector Laboratories, cat# H-1200, United States).

##### 373 **Microscopic image analysis.**

374 The preparations were visualized with an Axioplan 2 imaging microscope (Carl Zeiss) equipped with a CCD  
375 camera (CV M300, JAI), CHROMA filter sets, and the ISIS4 image-processing package (MetaSystems GmbH). In each  
376 specimen at least 20 well-spread pachytene nuclei containing complete chromosome sets were photographed. The  
377 brightness and contrast of all images were enhanced using Corel PaintShop Photo Pro X6 (Corel Corp).

378 **Chromosome measurements and generation of idiograms.**

379 The centromeres were identified by anticentromere antibodies. The length of the SC of each chromosome arm  
380 was measured in micrometers and the positions of centromeres were recorded using MicroMeasure 3.3<sup>58</sup>. We plotted  
381 idiograms after measuring at least 30 cells for each species. In each cell, we sorted SCs by their length in  $\mu\text{m}$ , identified  
382 those that can be distinguished unambiguously by the length and centromere index (most macrochromosomes in most  
383 species) and measured the average of these parameters across all cells. We grouped SCs that could not be  
384 unambiguously distinguished by the length and/or centromere indices (most microchromosomes in most species),  
385 ranged them within the group and measured the average parameters for each rank. Statistica 6.0 software package  
386 (StatSoft) was used for descriptive statistics.

- 387  
388 **References**
- 389 1. Damas, J., Kim, J., Farré, M., Griffin, D. K. & Larkin, D. M. Reconstruction of avian ancestral karyotypes reveals  
390 differences in the evolutionary history of macro- and microchromosomes. *Genome Biol.* **19**, 155 (2018).
  - 391 2. Romanov, M. N. *et al.* Reconstruction of gross avian genome structure, organization and evolution suggests  
392 that the chicken lineage most closely resembles the dinosaur avian ancestor. *BMC Genomics* **15**, 1060 (2014).
  - 393 3. Degrandi, T. M., Barcellos, S. A., Garnero, A. D. V., Hass, I. & Gunski, R. J. Bird Chromosome Database.  
394 <https://sites.unipampa.edu.br/birdchromosomedatabase/> (2021).
  - 395 4. Degrandi, T. M. *et al.* Introducing the Bird Chromosome Database: An overview of cytogenetic studies in birds.  
396 *Cytogenet. Genome Res.* **160**, 199–205 (2020).
  - 397 5. Kawakami, T. *et al.* Whole-genome patterns of linkage disequilibrium across flycatcher populations clarify the  
398 causes and consequences of fine-scale recombination rate variation in birds. *Mol. Ecol.* **26**, 4158–4172 (2017).
  - 399 6. Moses, M. J., Slatton, G. H., Gambling, T. M. & Starmer, C. F. Synaptonemal complex karyotyping in  
400 spermatocytes of the Chinese hamster (*Cricetulus griseus*). III. Quantitative evaluation. *Chromosoma* **60**, 345–  
401 375 (1977).
  - 402 7. Pigozzi, M. I. The chromosomes of birds during meiosis. *Cytogenet. Genome Res.* **150**, 128–138 (2016).
  - 403 8. Kichigin, I. G. *et al.* First report on B chromosome content in a reptilian species: the case of *Anolis carolinensis*.  
404 *Mol. Genet. Genomics* **0**, 0 (2018).
  - 405 9. Lisachov, A. P. & Borodin, P. M. Microchromosome polymorphism in the sand lizard, *Lacerta agilis* Linnaeus,  
406 1758 (Reptilia, Squamata). *Comp. Cytogenet.* **10**, 387–399 (2016).
  - 407 10. Lisachov, A. P., Trifonov, V. A., Giovannotti, M., Ferguson-Smith, M. A. & Borodin, P. M. Heteromorphism of  
408 "homomorphic sex chromosomes in two anole species (Squamata, Dactyloidae) revealed by synaptonemal  
409 complex analysis. *Cytogenet. Genome Res.* **151**, 89–95 (2017).
  - 410 11. Poorman, P. A., Moses, M. J., Davisson, M. T. & Roderick, T. H. Synaptonemal complex analysis of mouse  
411 chromosomal rearrangements. III. Cytogenetic observations on two paracentric inversions. *Chromosoma* **83**,  
412 419–429 (1981).
  - 413 12. del Priore, L., Pigozzi, M. I., Priore, L. & Pigozzi, M. I. Heterologous synapsis and crossover suppression in  
414 heterozygotes for a pericentric inversion in the Zebra Finch. *Cytogenet. Genome Res.* **147**, 154–160 (2015).
  - 415 13. Pigozzi, M. I. & Solari, A. J. Germ cell restriction and regular transmission of an accessory chromosome that  
416 mimics a sex body in the zebra finch, *Taeniopygia guttata*. *Chromosom. Res* **6**, 105–113 (1998).
  - 417 14. Torgasheva, A. A. *et al.* Germline-restricted chromosome (GRC) is widespread among songbirds. *Proc. Natl.*  
418 *Acad. Sci.* **116**, 11845–11650 (2019).
  - 419 15. Poignet, M. *et al.* Comparison of karyotypes in two hybridizing passerine species: conserved chromosomal  
420 structure but divergence in centromeric repeats. *Front. Genet.* **12**, 76898 (2021).
  - 421 16. Malinovskaya, L. P. *et al.* Germline-restricted chromosome (GRC) in the sand martin and the pale martin  
422 (*Hirundinidae*, Aves): synapsis, recombination and copy number variation. *Sci. Rep.* **10**, 1058 (2020).
  - 423 17. Torgasheva, A. *et al.* Germline restricted chromosome (GRC) in female and male meiosis of the great tit (*Parus*  
424 *major*, Linnaeus, 1758). *Front. Genet.* **12**, 2008 (2021).
  - 425 18. Bian, X.-Z. & Li, Q.-W. Studies on the karyotypes of birds. V. The 20 species of climber birds (Aves). *Zoological*  
426 *Research* vol. 10 309–317 (1989).
  - 427 19. Roslik, G. V. & Kryukov, A. P. A karyological study of some corvine birds (*Corvidae*, Aves). *Russ. J. Genet.* **37**,  
428 796–806 (2001).
  - 429 20. Bulatova, N. S. A comparative karyological study of Passerine birds. *Acta. Sci. Nat. Brno* **15**, 1–44 (1981).
  - 430 21. Udagawa, T. Karyogram Studies in Birds, I: Chromosomes of five passerines. *Cytologia (Tokyo)*. **17**, 311–316  
431 (1952).
  - 432 22. Li, X. & Bian, Q. Studies on the karyotypes of birds II. The 19 species of 12 families of Passerine  
433 birds. (*Passeriformes*, Aves). *Zool. Res.* **9**, 321–326. (1988).
  - 434 23. Sigeman, H. *et al.* Repeated sex chromosome evolution in vertebrates supported by expanded avian sex  
435 chromosomes. *Proc. R. Soc. B Biol. Sci.* **286**, (2019).
  - 436 24. Sigeman, H., Ponnikas, S. & Hansson, B. Whole-genome analysis across 10 songbird families within *Sylvoidea*

- 437 reveals a novel autosome–sex chromosome fusion. *Biol. Lett.* **16**, 20200082 (2020).
- 438 25. Bian, X.-Z., Li, Q.-W. & Ning, S.-X. Studies on the karyotypes of birds. III. 10 species of warblers and 4 species of  
439 flycatchers (Aves). *Zool. Res.* **12**, 215–219 (1991).
- 440 26. Torgasheva, A. *et al.* Highly conservative pattern of sex chromosome synapsis and recombination in  
441 Neognathae Birds. *Genes (Basel)*. **12**, 1358 (2021).
- 442 27. del Priore, L. & Pigozzi, M. I. Histone modifications related to chromosome silencing and elimination during  
443 male meiosis in Bengalese finch. *Chromosoma* **123**, 293–302 (2014).
- 444 28. Christidis, L. Chromosomal evolution within the family Estrildidae (Aves) II. The Lonchurae. *Genetica* **71**, 99–  
445 113 (1986).
- 446 29. Ray-Chaudhuri, R. Cytotaxonomy and chromosome evolution in Passeriformes (Aves): A comparative  
447 karyotype study of seventeen species. *J. Zool. Syst. Evol. Res.* **14**, 299–320 (1976).
- 448 30. Takagi, N. A comparative study of the chromosome replication in 6 species of birds. *Japanese J. Genet.* **47**,  
449 115–123 (1972).
- 450 31. Radzhabli, S. I., Panov, E. N. & N.S., B. Comparative studies of the karyotype of two closely related species of  
451 buntings (*Emberiza citrinella* and *E. leucocephalos*) hybridized in areas of overlap. *Zool. Zh.* **49**, 1857–1863  
452 (1970).
- 453 32. Bulatova, N. S. A cytotaxonomic study of three related families of birds: Fringillidae, Emberizidae, Ploceidae. *J.*  
454 *Zool. Syst. Evol. Res.* **11**, 233–239 (1973).
- 455 33. Recuerda, M. *et al.* Chromosome-level genome assembly of the common chaffinch (Aves: *Fringilla coelebs*): a  
456 valuable resource for evolutionary biology. *Genome Biol. Evol.* **13**, 1–6 (2021).
- 457 34. Piccinni, E. & Stella, M. Some avian karyograms. *Caryologia* **23**, 189–202 (1970).
- 458 35. Li, Q. & Bian, X. The study of bird karyotypes I: Fringillidae (Aves). *Zool. Res.* **4**, 387–392 (1987).
- 459 36. Hammar, B. O. & Herlin, M. Karyotypes of four bird species of the order Passeriformes. *Hereditas* **80**, 177–184  
460 (1975).
- 461 37. Christidis, L. Chromosomal evolution in finches and their allies (families: Ploceidae, Fringillidae, and  
462 Emberizidae). *Can. J. Genet. Cytol.* **28**, 762–769 (1986).
- 463 38. Ohno, S., Stenius, C., Christian, L. C., Becak, W. & Becak, M. L. Chromosomal uniformity in the avian subclass  
464 Carinatae. *Chromosoma* **15**, 280–288 (1964).
- 465 39. Da Silva Dos Santos, M. *et al.* Comparative cytogenetics between two important songbird, models: The zebra  
466 finch and the canary. *PLoS One* **12**, 1–13 (2017).
- 467 40. Kiazim, L. G. *et al.* Comparative mapping of the macrochromosomes of eight avian species provides further  
468 insight into their phylogenetic relationships and avian karyotype evolution. *Cells* **10**, 362 (2021).
- 469 41. Frankl-Vilches, C. *et al.* Using the canary genome to decipher the evolution of hormone-sensitive gene  
470 regulation in seasonal singing birds. *Genome Biol.* **16**, 19 (2015).
- 471 42. Christidis, L. *Animal cytogenetics 4: Chordata 3; B, Aves. Animal Cytogenetics.* (Gebrüder Borntraeger, 1990).
- 472 43. Neumann, P. *et al.* Epigenetic histone marks of extended meta-polycentric centromeres of lathyrus and pisum  
473 chromosomes. *Front. Plant Sci.* **7**, 234 (2016).
- 474 44. Neumann, P. *et al.* Centromeres off the hook: Massive changes in centromere size and structure following  
475 duplication of cenH3 gene in fabae species. *Mol. Biol. Evol.* **32**, 1862–1879 (2015).
- 476 45. Huang, Y.-C. *et al.* Evolution of long centromeres in fire ants. *BMC Evol. Biol.* **16**, 189 (2016).
- 477 46. Brinkley, B. R., Valdivia, M. M., Tousson, A. & Brenner, S. L. Compound kinetochores of the Indian muntjac -  
478 Evolution by linear fusion of unit kinetochores. *Chromosoma* **91**, 1–11 (1984).
- 479 47. Metcalfe, C. J. *et al.* Genomic instability within centromeres of interspecific marsupial hybrids. *Genetics* **177**,  
480 2507–2517 (2007).
- 481 48. Schubert, I. & Lysak, M. A. Interpretation of karyotype evolution should consider chromosome structural  
482 constraints. *Trends in Genetics* vol. 27 207–216 (2011).
- 483 49. Zhou, Q. *et al.* Complex evolutionary trajectories of sex chromosomes across bird taxa. *Science (80-. )*. **346**,  
484 1246338–1246338 (2014).
- 485 50. Hooper, D. M. & Price, T. D. Chromosomal inversion differences correlate with range overlap in passerine  
486 birds. *Nat. Ecol. Evol.* **1**, 1526–1534 (2017).
- 487 51. Kinsella, C. M. *et al.* Programmed DNA elimination of germline development genes in songbirds. *Nat.*  
488 *Commun.* **10**, 5468 (2019).
- 489 52. Damas, J. *et al.* Upgrading short-read animal genome assemblies to chromosome level using comparative  
490 genomics and a universal probe set. *Genome Res.* **27**, 875–884 (2017).
- 491 53. Weissensteiner, M. H. & Suh, A. Repetitive DNA: The dark matter of avian genomics. in *Avian Genomics in*  
492 *Ecology and Evolution* 93–150 (2019). doi:10.1007/978-3-030-16477-5\_5.
- 493 54. Peters, A. H., Plug, A. W., van Vugt, M. J. & de Boer, P. A drying-down technique for the spreading of  
494 mammalian meiocytes from the male and female germline. *Chromosom. Res.* **5**, 66–68 (1997).
- 495 55. Anderson, L. K., Reeves, A., Webb, L. M. & Ashley, T. Distribution of crossing over on mouse synaptonemal  
496 complexes using immunofluorescent localization of MLH1 protein. *Genetics* **151**, 1569–1579 (1999).

- 497 56. Zhao, D., Leghari, I. H., Li, J., Mi, Y. & Zhang, C. Isolation and culture of chicken growing follicles in 2- and 3-  
498 dimensional models. *Theriogenology* **111**, 43–51 (2018).  
499 57. Volkova, N. A. *et al.* Isolation and characterization of rooster (*Gallus gallus*) spermatogonia.  
500 *Sel'skokhozyaistvennaya Biol.* **51**, 450–458 (2016).  
501 58. Reeves, A. MicroMeasure: a new computer program for the collection and analysis of cytogenetic data.  
502 *Genome* **44**, 439–443 (2001).

503 **Declarations**

504 **Ethics approval**

505 The birds were handled and euthanized in accordance with the approved national guidelines for the care and  
506 use of laboratory animals. All experiments were reviewed and approved by the Animal Care and Use Committee of the  
507 Institute of Cytology and Genetics SB RAS (protocol # 114 of 17 December 2021).

508 **Acknowledgements**

509 We thank the Core Facility for Microscopy of Biologic Objects, SB RAS for granting access to microscopic  
510 equipment.

511 **Funding**

512 The study and open access fee were funded by Russian Science Foundation, grant number 20-64-46021.  
513 Microscopy was carried out at the Core Facility for Microscopy of Biologic Objects, SB RAS, Novosibirsk, Russia  
514 (regulation no. 3054). The funding bodies play no role in the design of the study and collection, analysis, and  
515 interpretation of data and in writing the manuscript.

516 **Authors' contributions**

517 A.T. and P.B. provided the research idea and designed the experiments. L.M., A.S., E.G., and I.P. conducted the  
518 experiments, collected the data, finished the data analysis and compiled the results. A.T. and P.B. supervised the  
519 research and wrote the main manuscript text. All authors reviewed and approved the final manuscript.

520 **Competing interests**

521 The authors declare that they have no competing interests.

522 **Availability of data and materials**

523 Publicly available datasets were analyzed in this study. These data can be found here:  
524 <https://meiosislabs.com/projects/chromosomes/17caryo.xls>.

525 **Supplementary materials**

526 Supplementary Table 1. Sources of the birds examined

527 Supplementary Table 2 Size of expanded centromeres

528

529

530 **Supplementary materials**

531 Supplementary Table 1. Sources of the birds examined

---

| Common name              | No of specimens | Source                                                             |
|--------------------------|-----------------|--------------------------------------------------------------------|
| Common cuckoo            | 1               | Provided by Bird Rehabilitation Centre after fatal accident trauma |
| Rook                     | 1               | Provided by Bird Rehabilitation Centre after fatal accident trauma |
| Blyth's reed warbler     | 1               | Trapped in Novosibirsk                                             |
| Eurasian skylark         | 1               | Trapped in Novosibirsk                                             |
| European pied flycatcher | 2               | Trapped in Novosibirsk                                             |
| Bengalese finch          | 1               | Purchased a commercial breeder                                     |
| Gouldian finch           | 1               | Purchased a commercial breeder                                     |
| Pine bunting             | 1               | Trapped in Novosibirsk                                             |
| Common chaffinch         | 1               | Purchased from a commercial breeder                                |
| Brambling                | 1               | Purchased from a commercial breeder                                |
| Eurasian bullfinch       | 2               | Provided by Bird Rehabilitation Centre after fatal accident trauma |
| European greenfinch      | 1               | Purchased from a commercial breeder                                |
| Common redpoll           | 1               | Purchased from a commercial breeder                                |
| Domestic canary          | 1               | Purchased from a commercial breeder                                |
| European goldfinch       | 1               | Purchased from a commercial breeder                                |
| Common linnet            | 1               | Purchased from a commercial breeder                                |
| Eurasian siskin          | 2               | Trapped in Novosibirsk                                             |

---

532

533

534

535 **Supplementary Table 2** Size of expanded centromeres

| Species        | SC rank    | SC length, $\mu\text{m}$ | Centromere length, $\mu\text{m}$ | Centromere length, % |
|----------------|------------|--------------------------|----------------------------------|----------------------|
| Flycatcher     | SC1        | 26.2 $\pm$ 1.9           | 2.3 $\pm$ 0.4                    | 8.6                  |
|                | SC2        | 20.3 $\pm$ 2.3           | 2.2 $\pm$ 0.7                    | 11.2                 |
|                | SC3        | 21.9 $\pm$ 3.9           | 2.5 $\pm$ 0.4                    | 11.6                 |
|                | SC5        | 15.0 $\pm$ 1.9           | 3.9 $\pm$ 0.7                    | 25.9                 |
|                | SC6/7      | 13.4 $\pm$ 1.6           | 2.1 $\pm$ 0.6                    | 15.4                 |
|                | SC8/10     | 8.8 $\pm$ 1.5            | 2.3 $\pm$ 0.4                    | 26.3                 |
|                | SC11/13    | 6.8 $\pm$ 0.4            | 2.8 $\pm$ 0.3                    | 41.3                 |
| Canary         | SC1        | 34.7 $\pm$ 5.2           | 3.5 $\pm$ 0.8                    | 10.1                 |
|                | SC2/3      | 27.3 $\pm$ 5.7           | 3.2 $\pm$ 0.8                    | 11.7                 |
|                | SC4        | 24.0 $\pm$ 3.7           | 2.3 $\pm$ 0.4                    | 9.4                  |
|                | SC5        | 19.1 $\pm$ 4.6           | 3.0 $\pm$ 0.8                    | 15.6                 |
|                | SC6        | 17.1 $\pm$ 5.5           | 1.4 $\pm$ 0.3                    | 8.2                  |
|                | SC10/11/12 | 9.5 $\pm$ 1.8            | 1.7 $\pm$ 0.3                    | 17.8                 |
| Gouldian finch | SC1        | 27.9 $\pm$ 4.4           | 3.6 $\pm$ 0.6                    | 13.6                 |
|                | SC2        | 22.5 $\pm$ 3.6           | 4.4 $\pm$ 0.6                    | 19.8                 |
|                | SC3        | 22.3 $\pm$ 3.7           | 3.8 $\pm$ 0.7                    | 17.1                 |

536
